# Supplementary material for: Fasting activates macroautophagy in neurons of Alzheimer’s disease mouse model but is insufficient to degrade amyloid-beta
Source: PubMed Central journal article supplement (PMC4648430; doi:10.1038/srep12115), 2015-07-14
Supplement: srep12115-s1.pdf [file srep12115-s1.pdf]

# **Fasting activates macroautophagy in neurons of Alzheimer's disease mouse model but is insufficient to degrade amyloid-beta**

**Xigui Chen<sup>1, \$\$</sup>, Kanoh Kondo<sup>1, \$\$</sup>, Kazumi Motoki<sup>1</sup>, Hidenori Homma<sup>1</sup> and Hitoshi Okazawa<sup>1, 2, #</sup>**

1: Department of Neuropathology, Medical Research Institute, Tokyo Medical and Dental University, 1-5-45 Yushima, Bunkyo-ku, Tokyo 113-8510, Japan

2: Center for Brain Integration Research, Tokyo Medical and Dental University, 1-5-45 Yushima, Bunkyo-ku, Tokyo 113-8510, Japan

\$\$: co-first authors

#: Correspondence should be addressed to H.O.

E-mail: [okazawa-ty@umin.ac.jp](mailto:okazawa-ty@umin.ac.jp)

## **Supplementary Information**

### **Supplementary Figure 1**

#### **Expression of EGFP-LC3 in cerebellum**

An image was reconstructed from three two-photon microscopy images of the cerebellar cortex of wild type mice (C57B6/J, 3 months of age) injected with EGFP-LC3 lentivirus to the cerebellum. EGFP-LC3 signals were extended along the orientation of Purkinje cell major dendrite. Granular cell layer (gra), Purkinje cell layer (PL), and molecular cell layer (mol) are indicated.

### **Supplementary Figure 2**

#### **Expression of EGFP-LC3 in Purkinje cells**

EGFP-LC3 lentivirus was injected to cerebellar cortex of Ptf1a-Cre;Td-Tomato mice (3 months of age) to examine the EGFP-LC3 expression in Purkinje cells. Cerebellar tissues were fixed by perfusion of 4% paraformaldehyde, and fluorescence of EGFP and TdTomato was directly observed by two-photon microscopy. EGFP signals were observed both in cell body and dendrites of Purkinje cells. In addition, granule cells expressed EGFP-LC3.

### **Supplementary Figure 3**

#### **Changes of body weight and blood glucose during fasting**

To confirm that fasting treatment was similarly loaded on 5xFAD and control mice, we checked body weight and blood glucose during fasting. The data showed the similar effects on two parameters by fasting. The numbers of mice are shown in the graphs. Mean +/- SE are shown. Two-way ANOVA followed by Tukey's test was used for comparison of multiple groups at a similar time. Asterisks (\*) indicate the significant difference between fasting and non-fasting groups of the same genotype mice in the multiple comparisons ( $p < 0.05$ ).

### **Supplementary Figure 4**

#### **Circadian rhythm of autophagosome at the similar position in the brain**

In chronological observation, we used vessels as hallmarks for positioning to

observe the same area in RSD. Representative images are shown.

### **Supplementary Figure 5**

#### **Quantitative analysis of autophagosome formation**

Under the condition that water and food were supplied to mice ad libitum, autophagosomes labeled by EGFP-LC3 lentivirus infected before 2 weeks were chronologically observed. Four parameters were calculated and plotted in the graphs (mean +/- SE).

### **Supplementary Figure 6**

Actual images used for the analyses in Figure 3A and B. Non-fasting wild type mice (upper left), fasting wild type mice (upper right), non-fasting 5xFAD mice (lower left), fasting 5xFAD mice (lower right).

### **Supplementary Table 1**

Actual p-values in statistical tests are shown in the list.

# Sup Fig 1

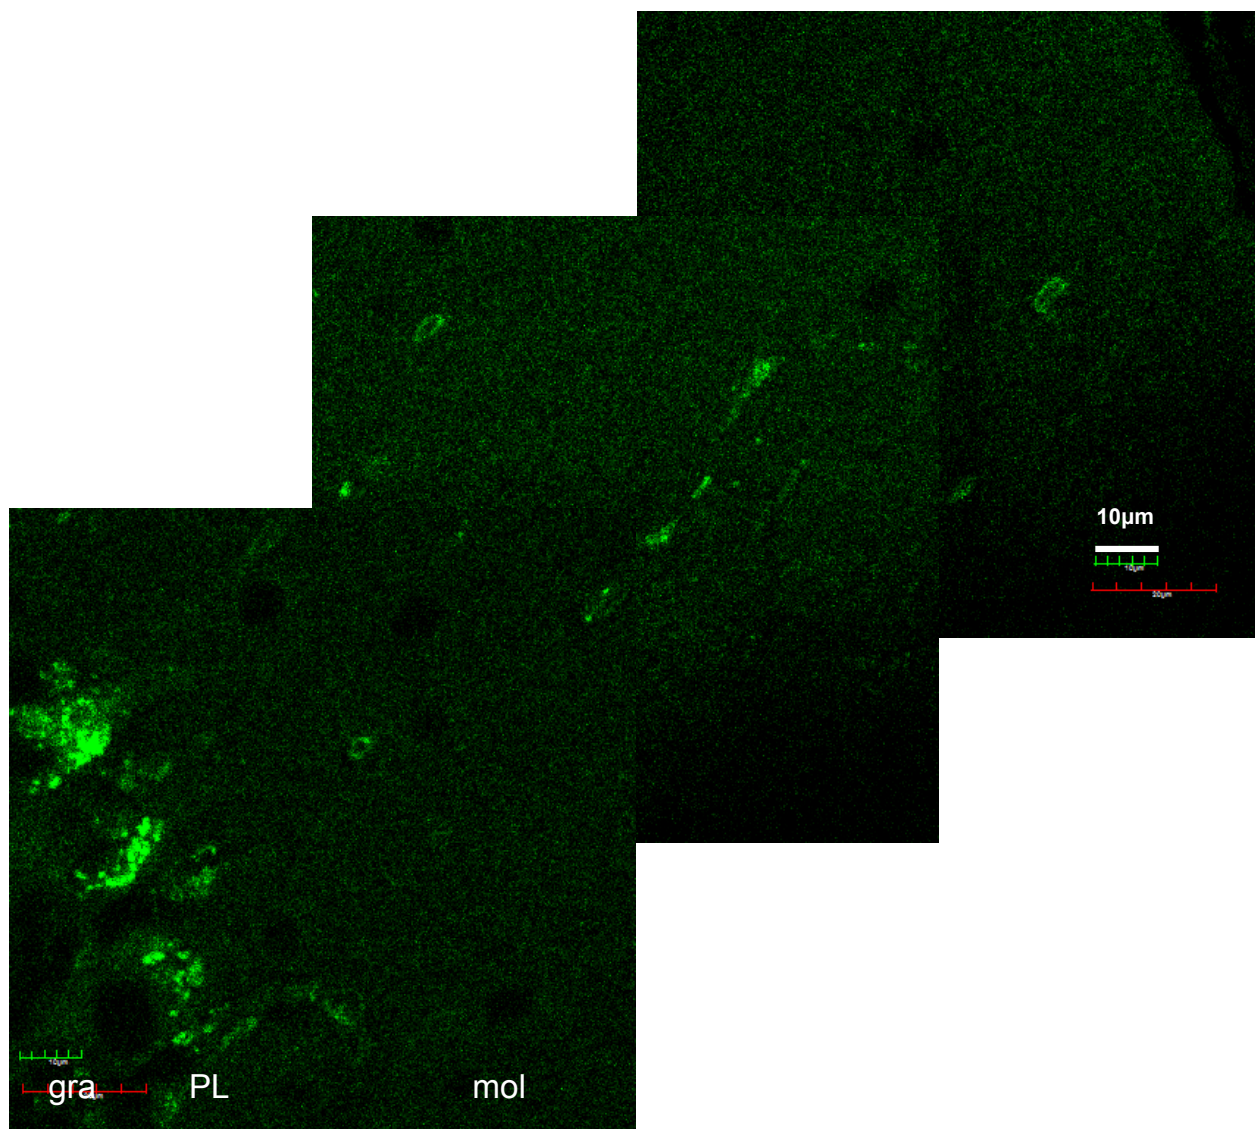

# Sup Fig 2

Ptf1a-Cre x Td-Tomato + EGFP-LC3 injection

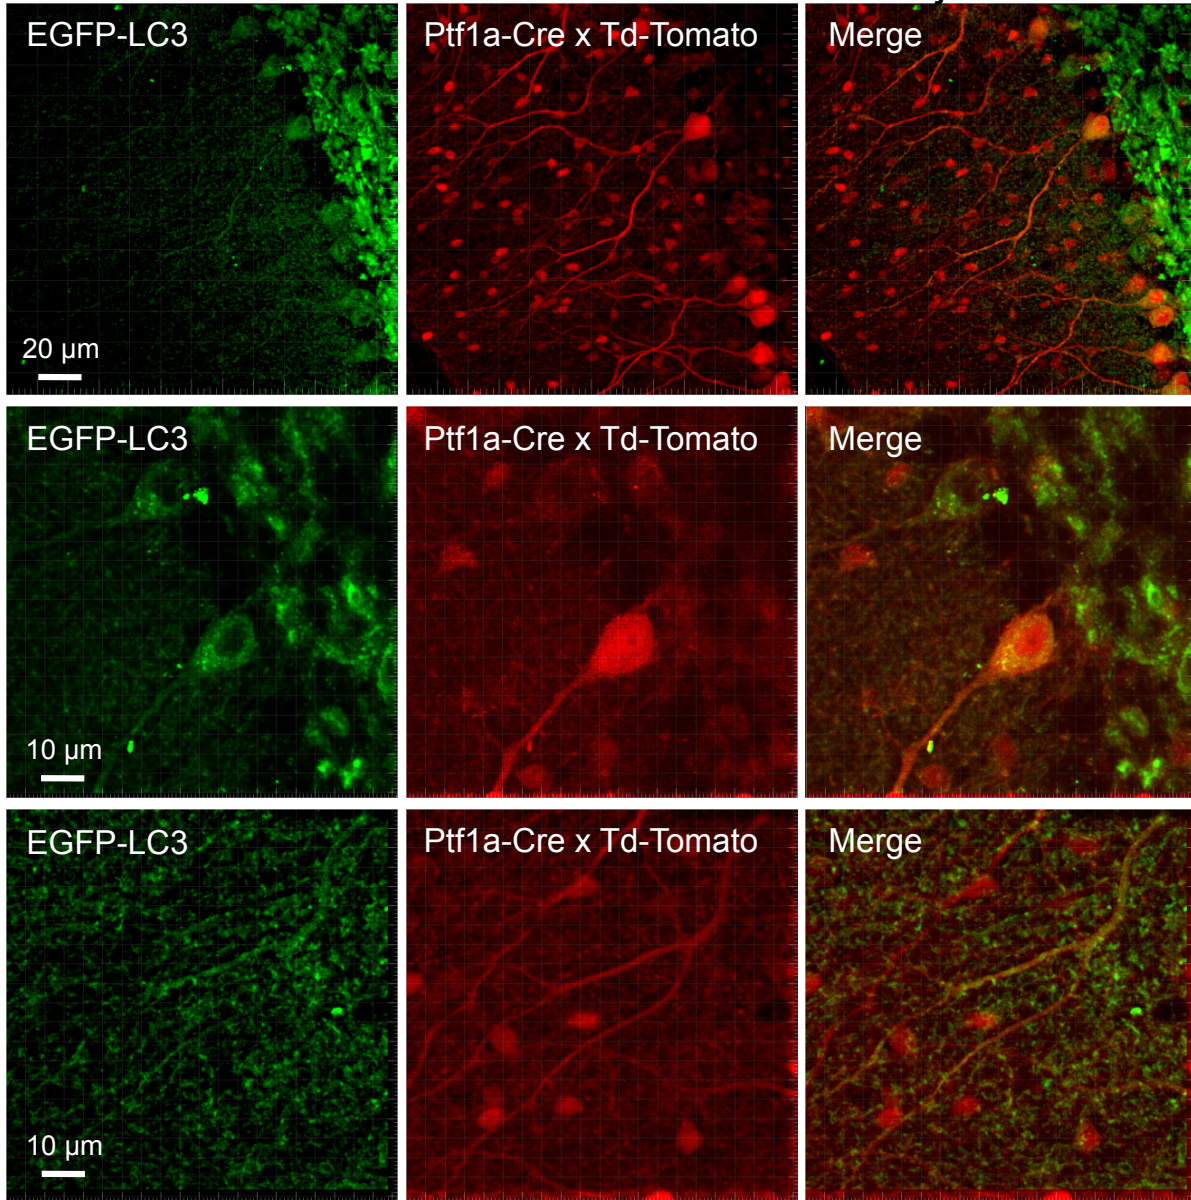

# Sup Fig 3

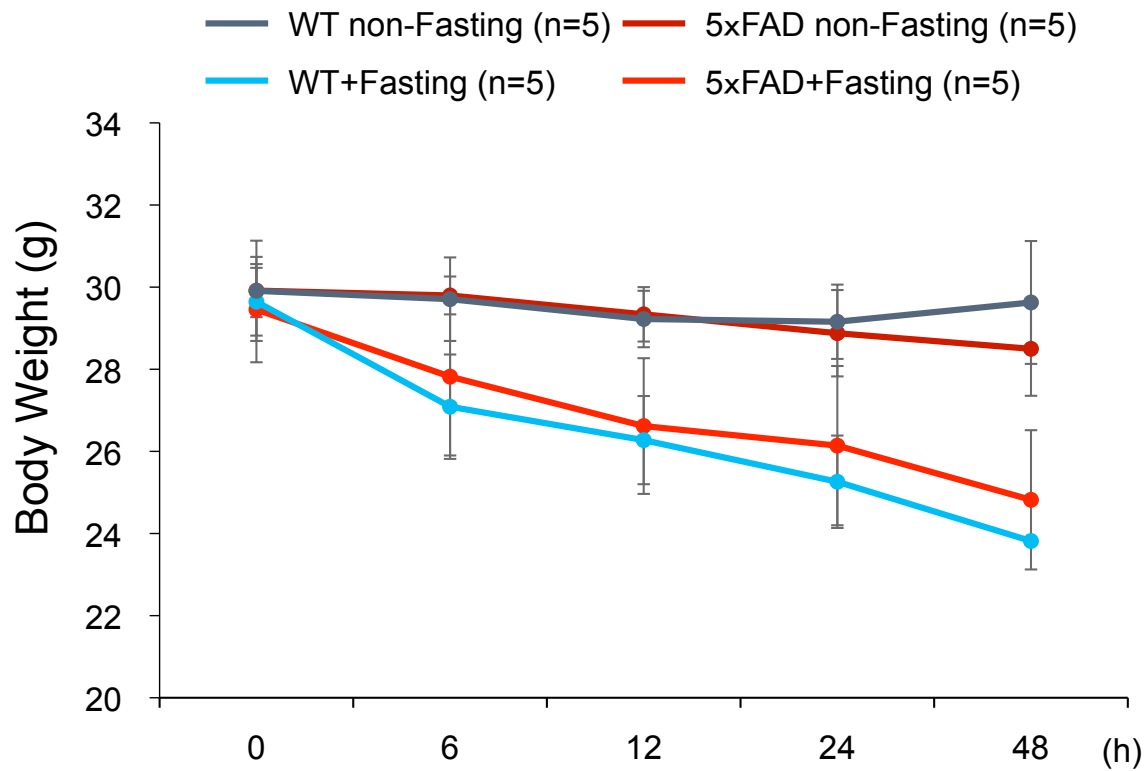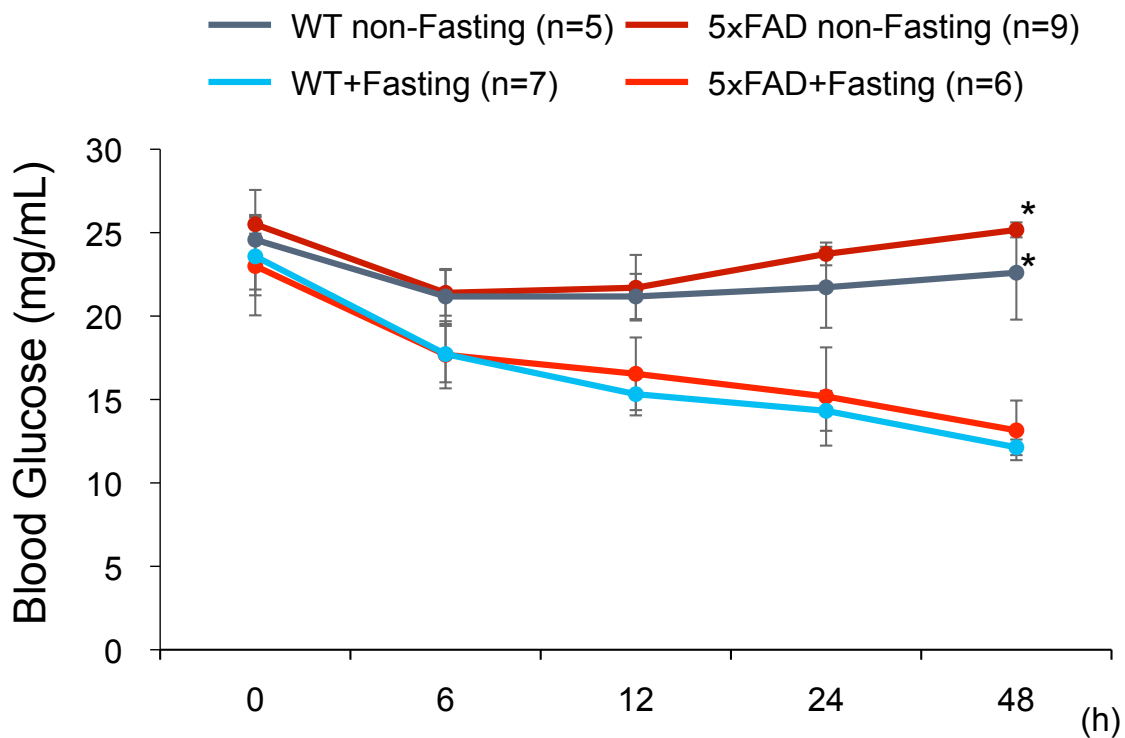

# or ## : WT+Fasting v.s. 5xFAD+Fasting

\* or \*\*: fasting + v.s. - in the same genotype

#, p<0.05; ##, p<0.01; \*, p<0.05; \*\*, p<0.01

by Two-way ANOVA followed by post hoc Tukey's test

# Sup Fig 4

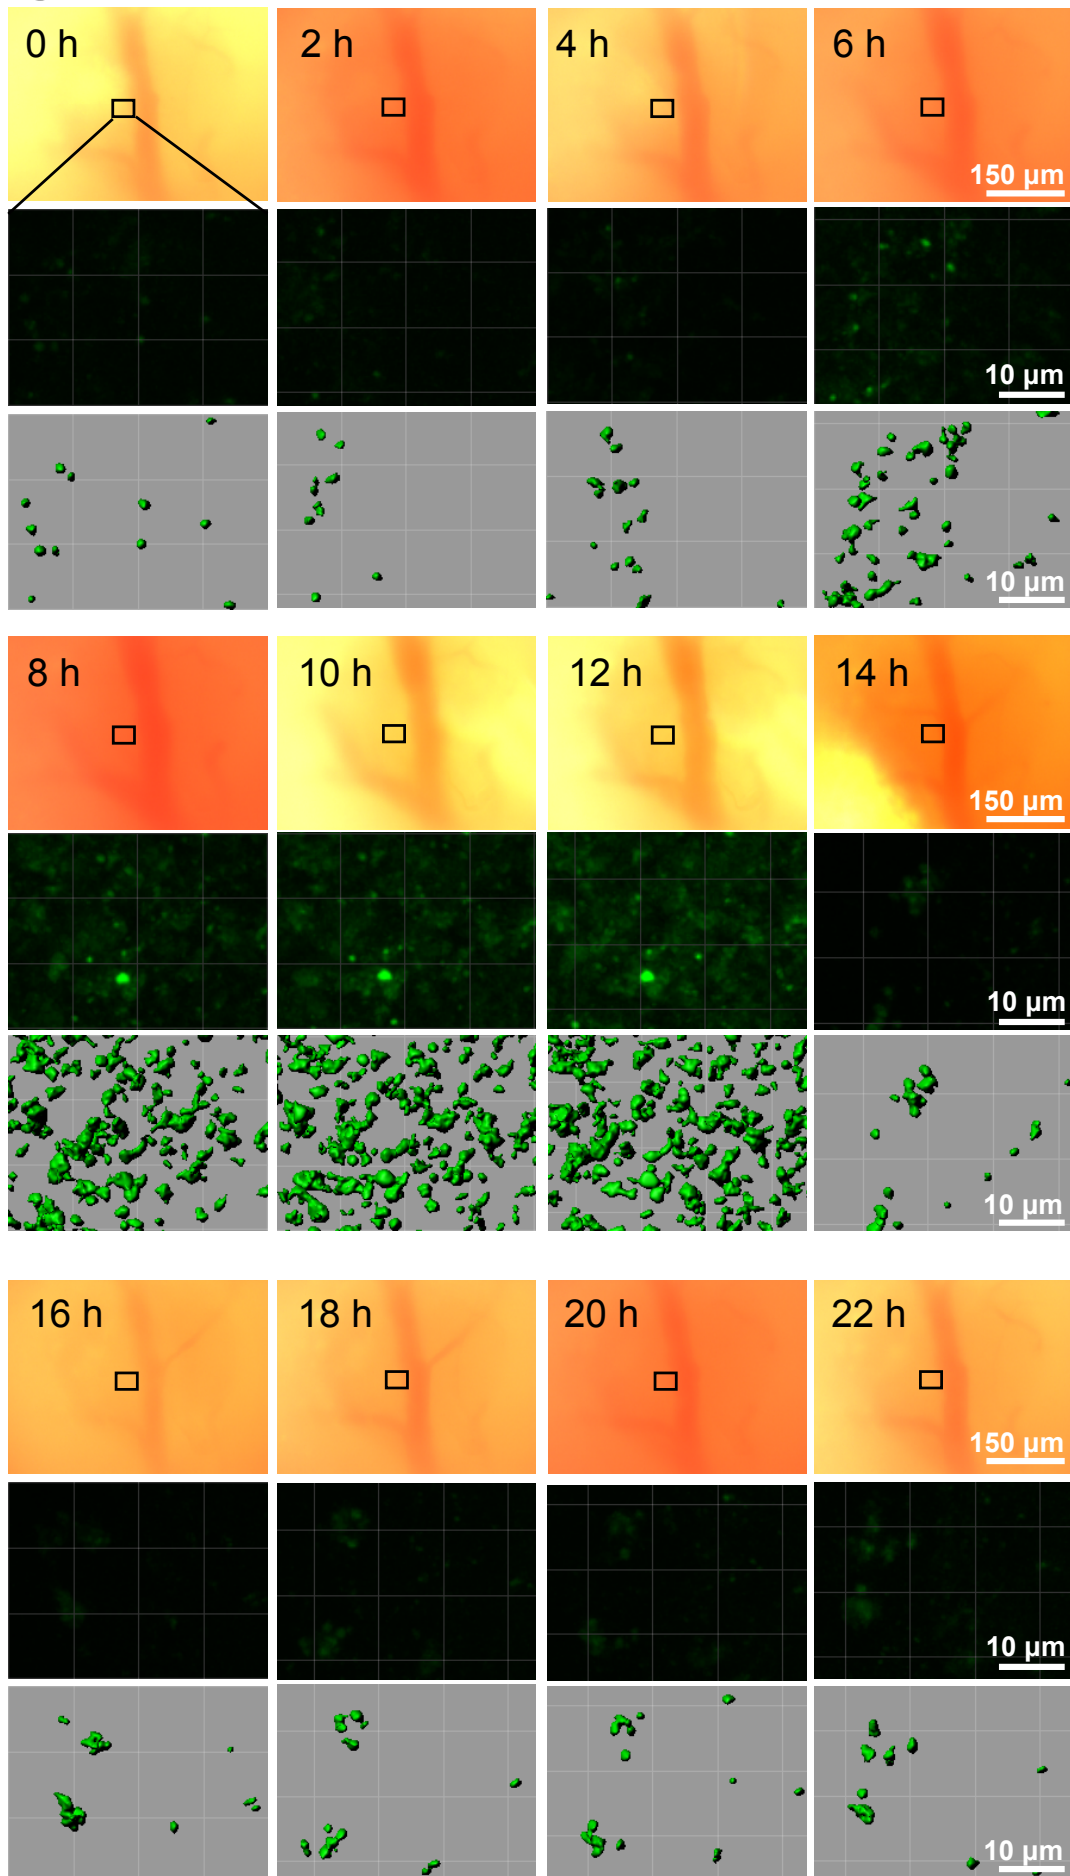

# Sup Fig 5

## Circadian rhythm of autophagosome

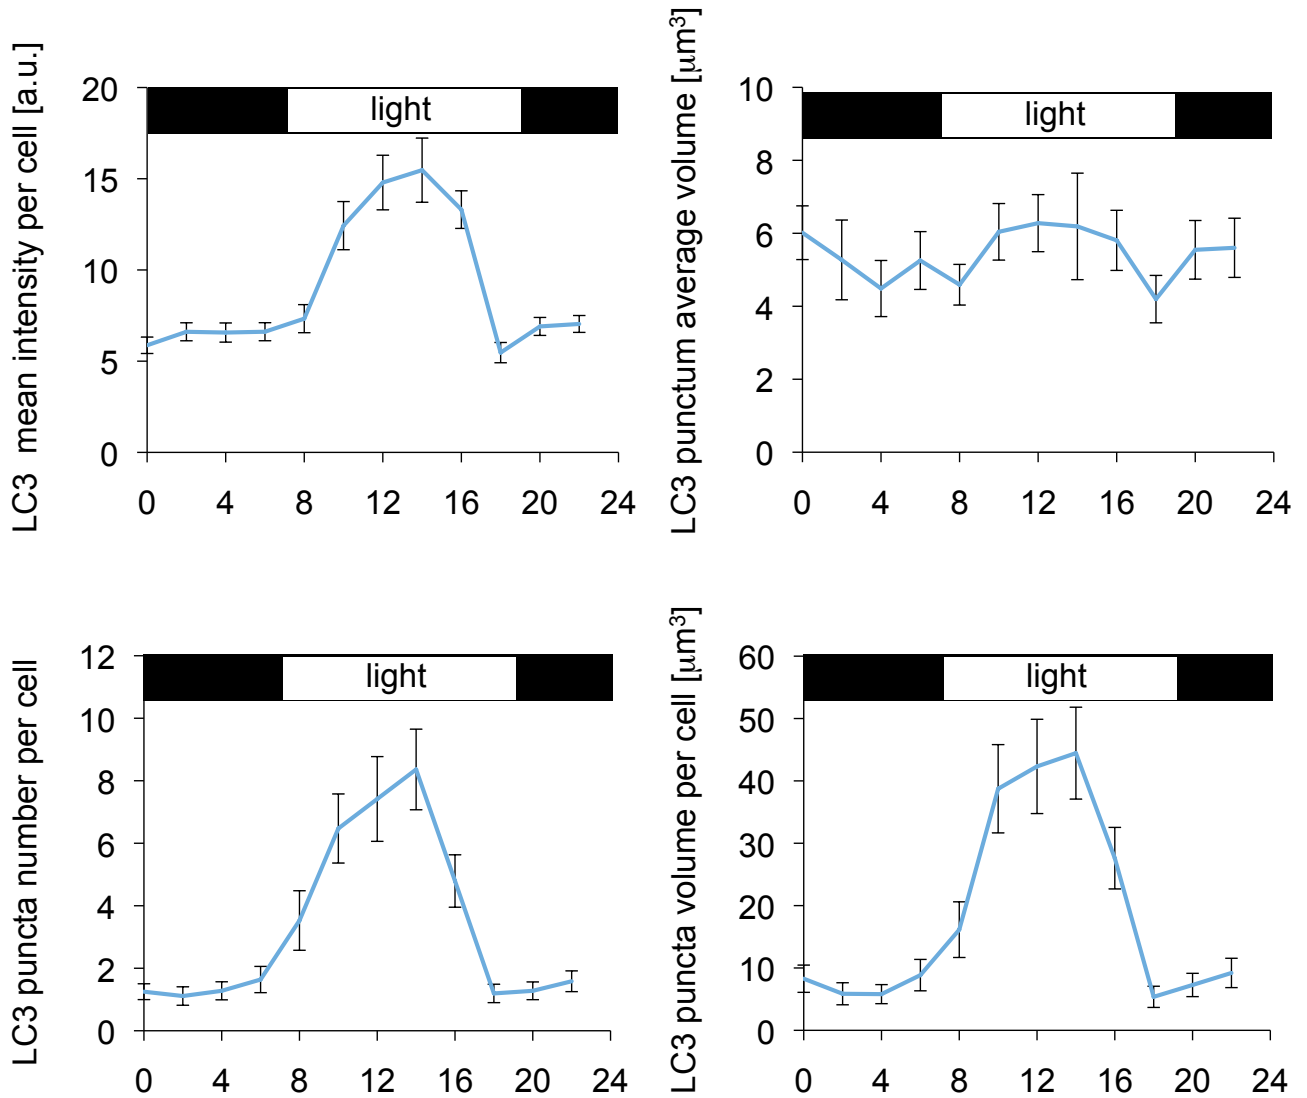

Mice, 3 months  
Observed 3 weeks after lentiviral vector injection  
n=34-37 cells



# Sup Fig 6

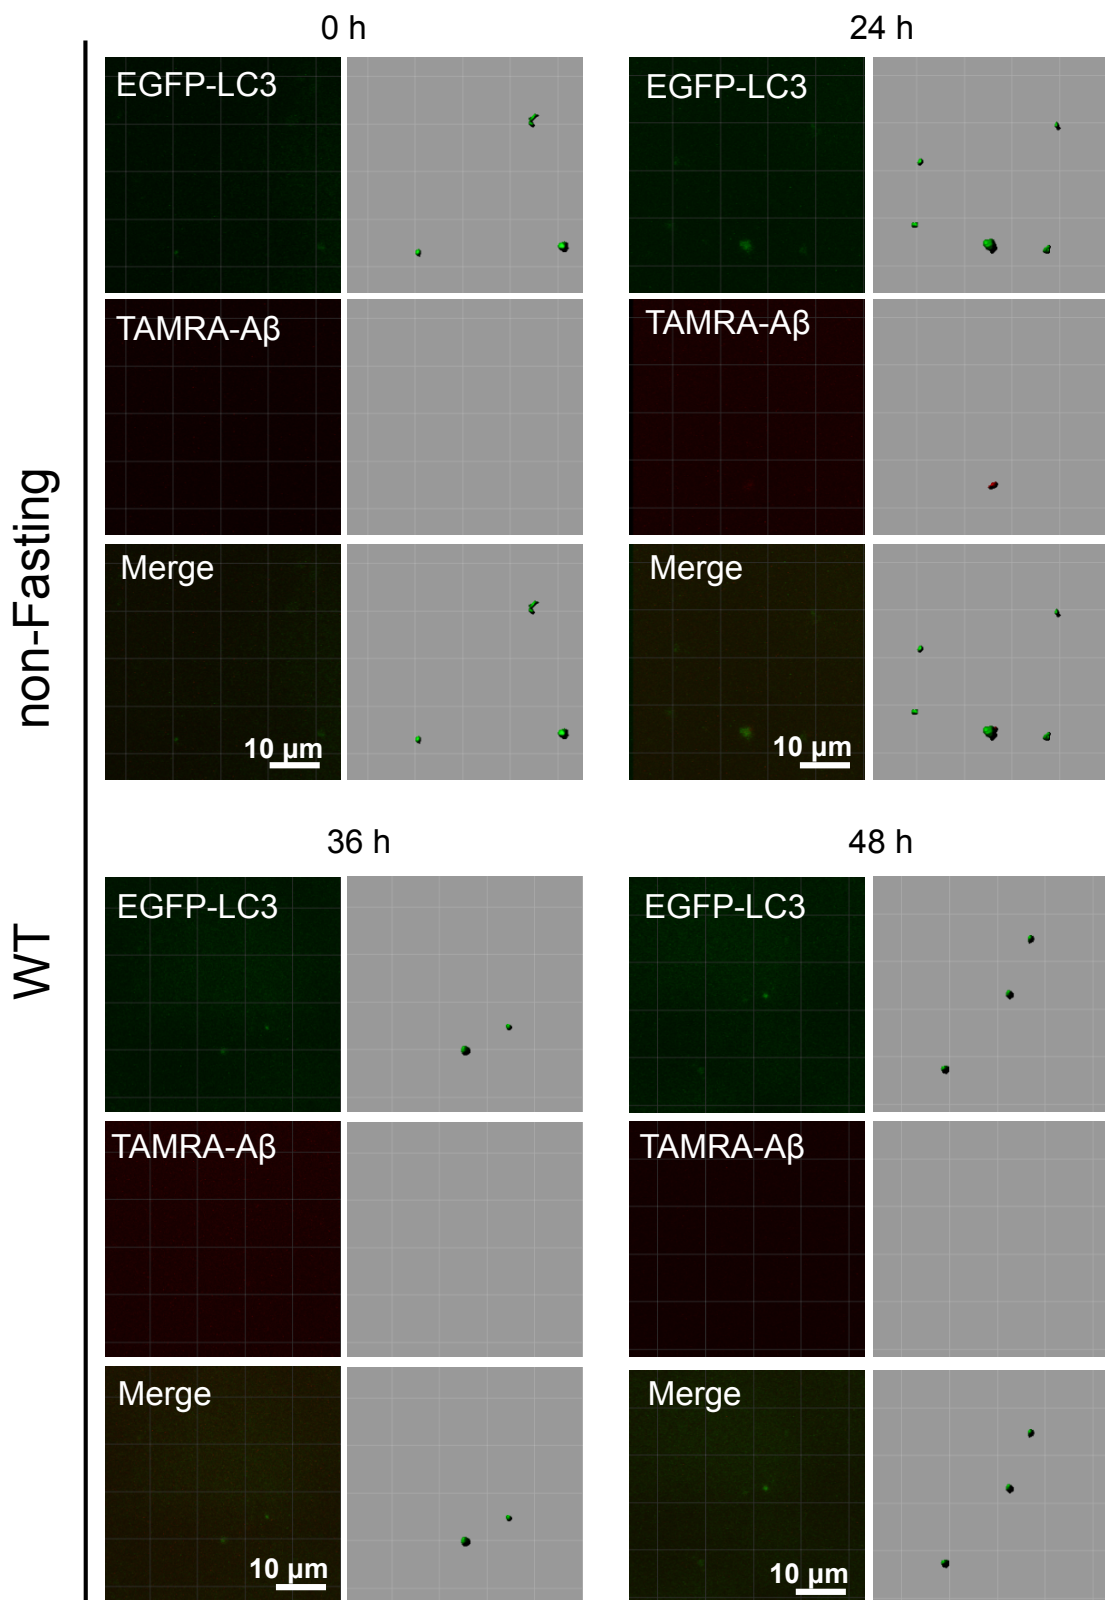

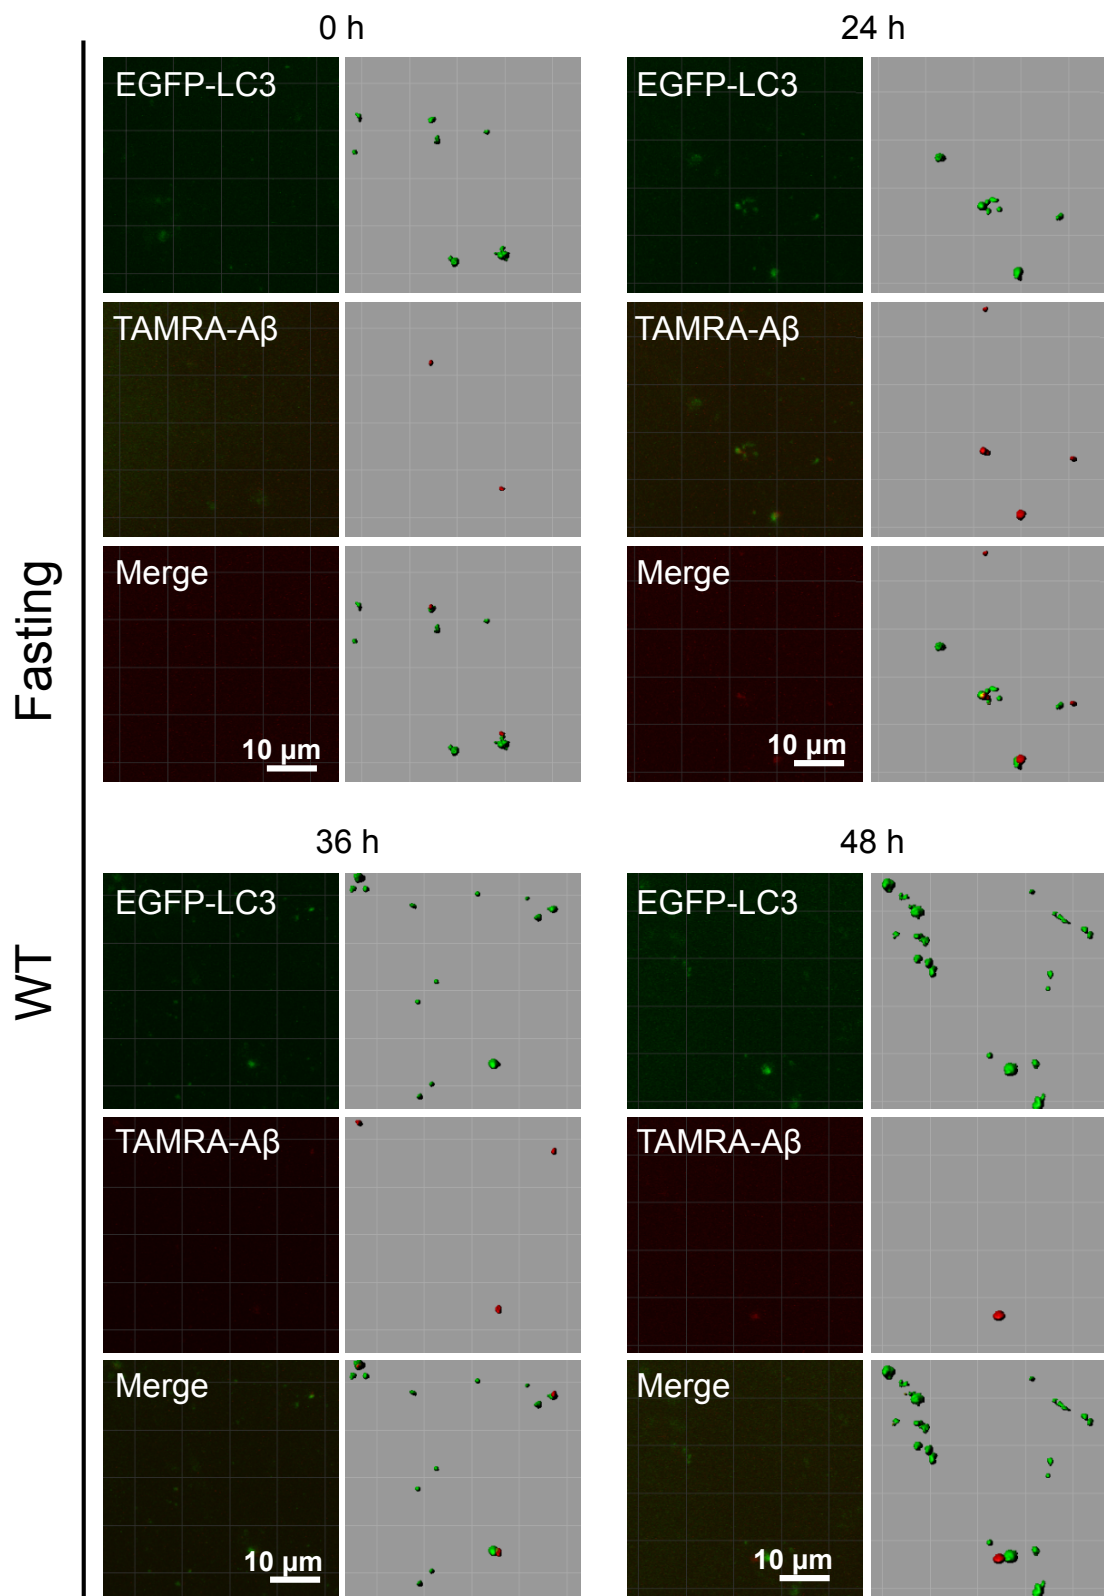

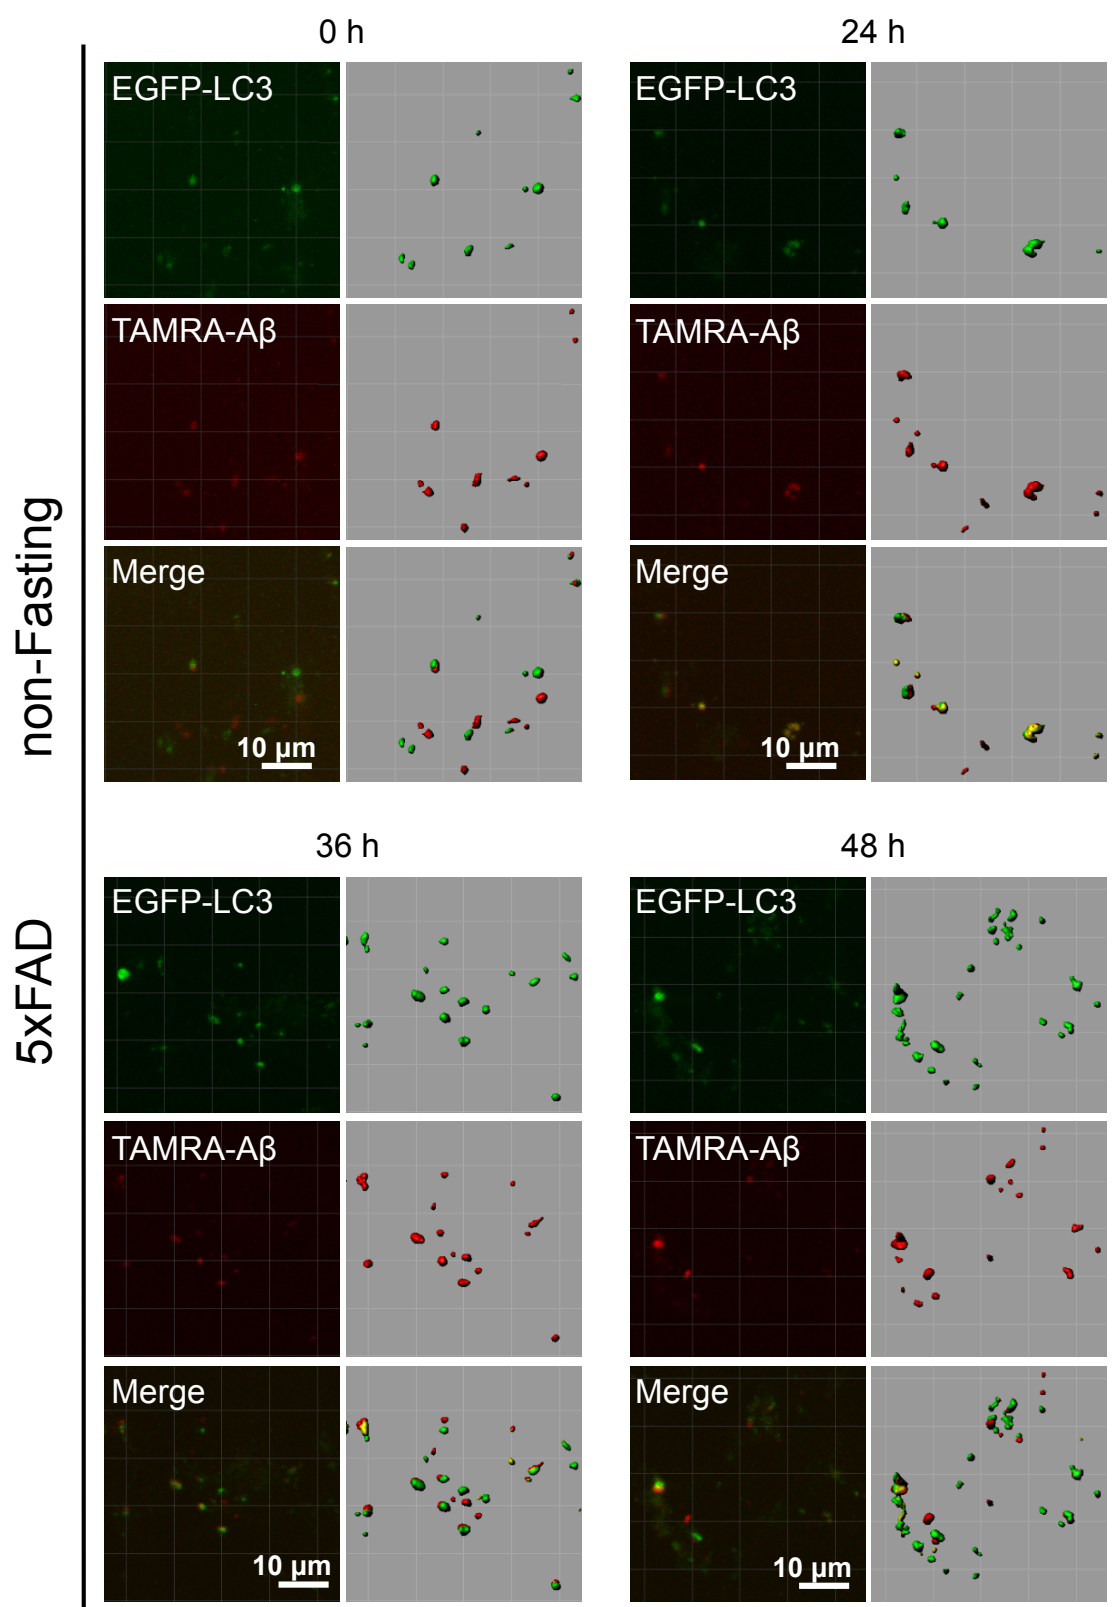

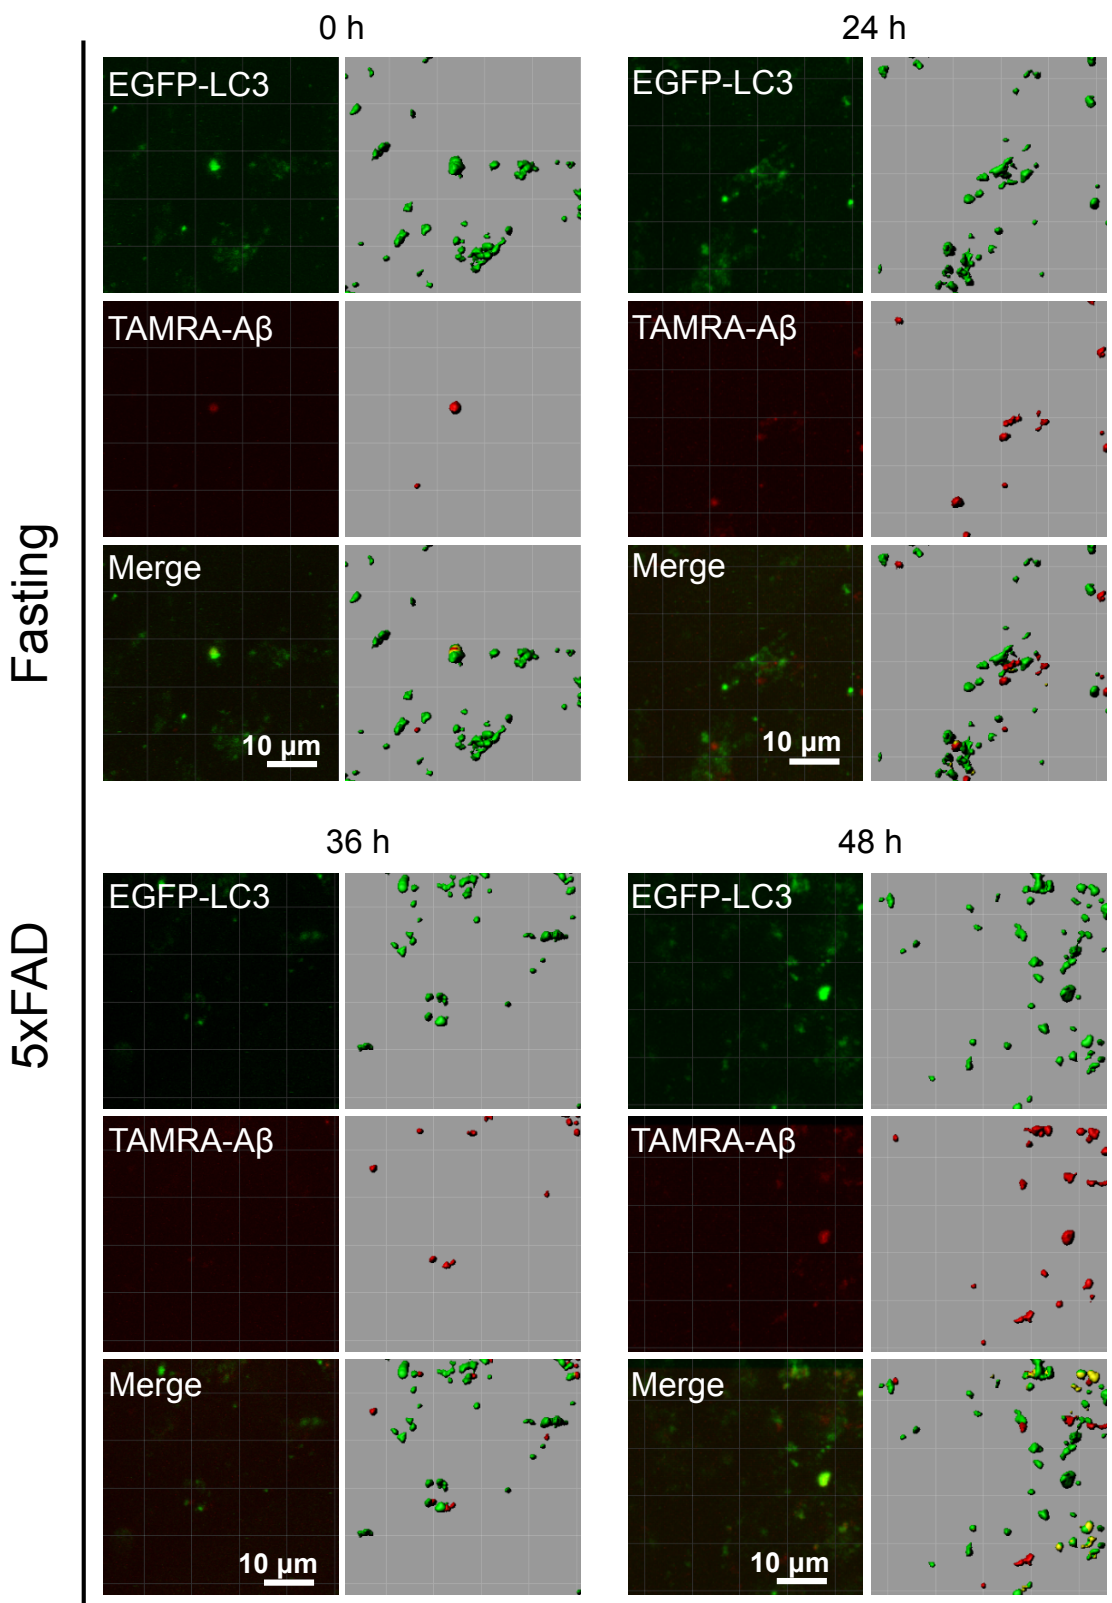

**Supplementary table 1: P-values in statistical tests.**

F=Fasting, n=non-Fasting

p<0.05

|                                               |                 |                        |                        | P-value |
|-----------------------------------------------|-----------------|------------------------|------------------------|---------|
| Figure 2C:<br>LC3 mean<br>signal<br>intensity | 0h              | 2-way<br>ANOVA         | Genotype (G)           | 5.E-11  |
|                                               |                 |                        | Diet (D)               | 0.798   |
|                                               |                 |                        | Interaction (G × D)    | 0.869   |
|                                               |                 | Tukey's<br>test        | 5xFAD (n) vs 5xFAD (F) | 0.991   |
|                                               |                 |                        | WT (F) vs 5xFAD (F)    | 5.E-06  |
|                                               |                 |                        | WT (n) vs 5xFAD (n)    | 2.E-05  |
|                                               | 6h              | 2-way<br>ANOVA         | Genotype (G)           | 0.001   |
|                                               |                 |                        | Diet (D)               | 0.202   |
|                                               |                 |                        | Interaction (G × D)    | 0.050   |
|                                               |                 | Tukey's<br>test        | 5xFAD (n) vs 5xFAD (F) | 0.970   |
|                                               |                 |                        | WT (F) vs 5xFAD (F)    | 0.717   |
|                                               |                 |                        | WT (n) vs 5xFAD (n)    | 0.001   |
|                                               | 12h             | 2-way<br>ANOVA         | Genotype (G)           | 1.E-10  |
|                                               |                 |                        | Diet (D)               | 2.E-14  |
|                                               |                 |                        | Interaction (G × D)    | 0.004   |
|                                               |                 | Tukey's<br>test        | 5xFAD (n) vs 5xFAD (F) | 9.E-13  |
|                                               |                 |                        | WT (F) vs 5xFAD (F)    | 2.E-10  |
|                                               |                 |                        | WT (n) vs 5xFAD (n)    | 0.030   |
|                                               | 24h             | 2-way<br>ANOVA         | Genotype (G)           | 3.E-12  |
|                                               |                 |                        | Diet (D)               | 3.E-24  |
|                                               |                 |                        | Interaction (G × D)    | 1.E-05  |
|                                               |                 | Tukey's<br>test        | 5xFAD (n) vs 5xFAD (F) | 7.E-15  |
|                                               |                 |                        | WT (F) vs 5xFAD (F)    | 4.E-14  |
|                                               |                 |                        | WT (n) vs 5xFAD (n)    | 0.043   |
| 48h                                           | 2-way<br>ANOVA  | Genotype (G)           | 2.E-19                 |         |
|                                               |                 | Diet (D)               | 4.E-50                 |         |
|                                               |                 | Interaction (G × D)    | 1.E-12                 |         |
|                                               | Tukey's<br>test | 5xFAD (n) vs 5xFAD (F) | 0.E+00                 |         |
|                                               |                 | WT (F) vs 5xFAD (F)    | 0.E+00                 |         |
|                                               |                 | WT (n) vs 5xFAD (n)    | 0.247                  |         |
|                                               |                 |                        | WT (n) vs WT (F)       | 0.E+00  |

|                                                   |                 |                        |                        | P-value |
|---------------------------------------------------|-----------------|------------------------|------------------------|---------|
| Figure 2C:<br>LC3<br>puncta<br>number<br>per cell | 0h              | 2-way<br>ANOVA         | Genotype (G)           | 0.019   |
|                                                   |                 |                        | Diet (D)               | 0.860   |
|                                                   |                 |                        | Interaction (G × D)    | 0.721   |
|                                                   |                 | Tukey's<br>test        | 5xFAD (n) vs 5xFAD (F) | 0.984   |
|                                                   |                 |                        | WT (F) vs 5xFAD (F)    | 0.140   |
|                                                   |                 |                        | WT (n) vs 5xFAD (n)    | 0.725   |
|                                                   | 6h              | 2-way<br>ANOVA         | Genotype (G)           | 9.E-05  |
|                                                   |                 |                        | Diet (D)               | 0.445   |
|                                                   |                 |                        | Interaction (G × D)    | 0.228   |
|                                                   |                 | Tukey's<br>test        | 5xFAD (n) vs 5xFAD (F) | 0.538   |
|                                                   |                 |                        | WT (F) vs 5xFAD (F)    | 4.E-04  |
|                                                   |                 |                        | WT (n) vs 5xFAD (n)    | 0.612   |
|                                                   | 12h             | 2-way<br>ANOVA         | Genotype (G)           | 6.E-06  |
|                                                   |                 |                        | Diet (D)               | 0.006   |
|                                                   |                 |                        | Interaction (G × D)    | 0.782   |
|                                                   |                 | Tukey's<br>test        | 5xFAD (n) vs 5xFAD (F) | 0.088   |
|                                                   |                 |                        | WT (F) vs 5xFAD (F)    | 1.E-04  |
|                                                   |                 |                        | WT (n) vs 5xFAD (n)    | 0.060   |
|                                                   | 24h             | 2-way<br>ANOVA         | Genotype (G)           | 0.289   |
|                                                   |                 |                        | Diet (D)               | 4.E-06  |
| Interaction (G × D)                               |                 |                        | 0.629                  |         |
| Tukey's<br>test                                   |                 | 5xFAD (n) vs 5xFAD (F) | 0.003                  |         |
|                                                   |                 | WT (F) vs 5xFAD (F)    | 0.553                  |         |
|                                                   |                 | WT (n) vs 5xFAD (n)    | 0.455                  |         |
| 48h                                               | 2-way<br>ANOVA  | Genotype (G)           | 0.040                  |         |
|                                                   |                 | Diet (D)               | 3.E-12                 |         |
|                                                   |                 | Interaction (G × D)    | 0.147                  |         |
|                                                   | Tukey's<br>test | 5xFAD (n) vs 5xFAD (F) | 3.E-10                 |         |
|                                                   |                 | WT (F) vs 5xFAD (F)    | 0.016                  |         |
|                                                   |                 | WT (n) vs 5xFAD (n)    | 0.965                  |         |
|                                                   |                 |                        | WT (n) vs WT (F)       | 0.024   |

|                                                             |                 |                        | P-value                |       |
|-------------------------------------------------------------|-----------------|------------------------|------------------------|-------|
| Figure 2C:<br>LC3<br>vesicle<br>total<br>volume<br>per cell | 0h              | 2-way<br>ANOVA         | Genotype (G)           | 0.023 |
|                                                             |                 |                        | Diet (D)               | 0.725 |
|                                                             |                 |                        | Interaction (G × D)    | 0.822 |
|                                                             |                 | Tukey's<br>test        | 5xFAD (n) vs 5xFAD (F) | 0.999 |
|                                                             |                 |                        | WT (F) vs 5xFAD (F)    | 0.283 |
|                                                             |                 |                        | WT (n) vs 5xFAD (n)    | 0.441 |
|                                                             | 6h              | 2-way<br>ANOVA         | Genotype (G)           | 0.065 |
|                                                             |                 |                        | Diet (D)               | 0.981 |
|                                                             |                 |                        | Interaction (G × D)    | 0.503 |
|                                                             |                 | Tukey's<br>test        | 5xFAD (n) vs 5xFAD (F) | 0.980 |
|                                                             |                 |                        | WT (F) vs 5xFAD (F)    | 0.232 |
|                                                             |                 |                        | WT (n) vs 5xFAD (n)    | 0.969 |
|                                                             | 12h             | 2-way<br>ANOVA         | Genotype (G)           | 0.003 |
|                                                             |                 |                        | Diet (D)               | 0.419 |
|                                                             |                 |                        | Interaction (G × D)    | 0.590 |
|                                                             |                 | Tukey's<br>test        | 5xFAD (n) vs 5xFAD (F) | 0.986 |
|                                                             |                 |                        | WT (F) vs 5xFAD (F)    | 0.108 |
|                                                             |                 |                        | WT (n) vs 5xFAD (n)    | 0.126 |
|                                                             | 24h             | 2-way<br>ANOVA         | Genotype (G)           | 0.008 |
|                                                             |                 |                        | Diet (D)               | 0.037 |
| Interaction (G × D)                                         |                 |                        | 0.799                  |       |
| Tukey's<br>test                                             |                 | 5xFAD (n) vs 5xFAD (F) | 0.409                  |       |
|                                                             |                 | WT (F) vs 5xFAD (F)    | 0.092                  |       |
|                                                             |                 | WT (n) vs 5xFAD (n)    | 0.236                  |       |
| 48h                                                         | 2-way<br>ANOVA  | Genotype (G)           | 0.021                  |       |
|                                                             |                 | Diet (D)               | 6.E-06                 |       |
|                                                             |                 | Interaction (G × D)    | 0.322                  |       |
|                                                             | Tukey's<br>test | 5xFAD (n) vs 5xFAD (F) | 1.E-04                 |       |
|                                                             |                 | WT (F) vs 5xFAD (F)    | 0.030                  |       |
|                                                             |                 | WT (n) vs 5xFAD (n)    | 0.802                  |       |
|                                                             |                 | WT (n) vs WT (F)       | 0.286                  |       |

|                                         |                 |                        |                        | P-value |
|-----------------------------------------|-----------------|------------------------|------------------------|---------|
| Figure 3C:<br>Red<br>Volume<br>per cell | 0h              | 2-way<br>ANOVA         | Genotype (G)           | 1.E-07  |
|                                         |                 |                        | Diet (D)               | 0.894   |
|                                         |                 |                        | Interaction (G × D)    | 0.846   |
|                                         |                 | Tukey's<br>test        | 5xFAD (n) vs 5xFAD (F) | 1.000   |
|                                         |                 |                        | WT (F) vs 5xFAD (F)    | 0.003   |
|                                         |                 |                        | WT (n) vs 5xFAD (n)    | 3.E-04  |
|                                         | 24h             | 2-way<br>ANOVA         | Genotype (G)           | 2.E-09  |
|                                         |                 |                        | Diet (D)               | 0.256   |
|                                         |                 |                        | Interaction (G × D)    | 0.729   |
|                                         |                 | Tukey's<br>test        | 5xFAD (n) vs 5xFAD (F) | 0.723   |
|                                         |                 |                        | WT (F) vs 5xFAD (F)    | 3.E-05  |
|                                         |                 |                        | WT (n) vs 5xFAD (n)    | 1.E-04  |
|                                         | 36h             | 2-way<br>ANOVA         | Genotype (G)           | 2.E-12  |
|                                         |                 |                        | Diet (D)               | 0.059   |
|                                         |                 |                        | Interaction (G × D)    | 0.108   |
|                                         |                 | Tukey's<br>test        | 5xFAD (n) vs 5xFAD (F) | 0.068   |
|                                         |                 |                        | WT (F) vs 5xFAD (F)    | 9.E-09  |
|                                         |                 |                        | WT (n) vs 5xFAD (n)    | 2.E-05  |
| 48h                                     | 2-way<br>ANOVA  | Genotype (G)           | 1.E-20                 |         |
|                                         |                 | Diet (D)               | 2.E-07                 |         |
|                                         |                 | Interaction (G × D)    | 2.E-11                 |         |
|                                         | Tukey's<br>test | 5xFAD (n) vs 5xFAD (F) | 0.000                  |         |
|                                         |                 | WT (F) vs 5xFAD (F)    | 0.000                  |         |
|                                         |                 | WT (n) vs 5xFAD (n)    | 2.E-05                 |         |
|                                         |                 |                        | WT (n) vs WT (F)       | 0.774   |



|                                            |                 |                        |                        | P-value |
|--------------------------------------------|-----------------|------------------------|------------------------|---------|
| Figure 3C:<br>Yellow<br>Volume<br>per cell | 0h              | 2-way<br>ANOVA         | Genotype (G)           | 0.004   |
|                                            |                 |                        | Diet (D)               | 0.908   |
|                                            |                 |                        | Interaction (G × D)    | 0.908   |
|                                            |                 | Tukey's<br>test        | 5xFAD (n) vs 5xFAD (F) | 0.998   |
|                                            |                 |                        | WT (F) vs 5xFAD (F)    | 0.136   |
|                                            |                 |                        | WT (n) vs 5xFAD (n)    | 0.189   |
|                                            |                 |                        | WT (n) vs WT (F)       | 1       |
|                                            | 24h             | 2-way<br>ANOVA         | Genotype (G)           | 5.E-04  |
|                                            |                 |                        | Diet (D)               | 0.001   |
|                                            |                 |                        | Interaction (G × D)    | 0.008   |
|                                            |                 | Tukey's<br>test        | 5xFAD (n) vs 5xFAD (F) | 2.E-04  |
|                                            |                 |                        | WT (F) vs 5xFAD (F)    | 1.E-04  |
|                                            |                 |                        | WT (n) vs 5xFAD (n)    | 0.927   |
|                                            |                 |                        | WT (n) vs WT (F)       | 0.957   |
|                                            | 36h             | 2-way<br>ANOVA         | Genotype (G)           | 0.004   |
| Diet (D)                                   |                 |                        | 0.025                  |         |
| Interaction (G × D)                        |                 |                        | 0.129                  |         |
| Tukey's<br>test                            |                 | 5xFAD (n) vs 5xFAD (F) | 0.044                  |         |
|                                            |                 | WT (F) vs 5xFAD (F)    | 0.014                  |         |
|                                            |                 | WT (n) vs 5xFAD (n)    | 0.883                  |         |
|                                            |                 | WT (n) vs WT (F)       | 0.915                  |         |
| 48h                                        | 2-way<br>ANOVA  | Genotype (G)           | 0.014                  |         |
|                                            |                 | Diet (D)               | 5.E-03                 |         |
|                                            |                 | Interaction (G × D)    | 0.025                  |         |
|                                            | Tukey's<br>test | 5xFAD (n) vs 5xFAD (F) | 3.E-03                 |         |
|                                            |                 | WT (F) vs 5xFAD (F)    | 0.004                  |         |
|                                            |                 | WT (n) vs 5xFAD (n)    | 0.958                  |         |
|                                            |                 | WT (n) vs WT (F)       | 0.915                  |         |

|                                 |                 |                        |                        | P-value |
|---------------------------------|-----------------|------------------------|------------------------|---------|
| Sup Fig<br>3C: Blood<br>Glucose | 0h              | 2-way<br>ANOVA         | Genotype (G)           | 0.277   |
|                                 |                 |                        | Diet (D)               | 0.649   |
|                                 |                 |                        | Interaction (G × D)    | 0.474   |
|                                 |                 | Tukey's<br>test        | 5xFAD (n) vs 5xFAD (F) | 0.843   |
|                                 |                 |                        | WT (F) vs 5xFAD (F)    | 0.998   |
|                                 |                 |                        | WT (n) vs 5xFAD (n)    | 0.614   |
|                                 | 6h              | 2-way<br>ANOVA         | Genotype (G)           | 0.839   |
|                                 |                 |                        | Diet (D)               | 0.104   |
|                                 |                 |                        | Interaction (G × D)    | 0.686   |
|                                 |                 | Tukey's<br>test        | 5xFAD (n) vs 5xFAD (F) | 0.738   |
|                                 |                 |                        | WT (F) vs 5xFAD (F)    | 0.999   |
|                                 |                 |                        | WT (n) vs 5xFAD (n)    | 0.930   |
|                                 | 12h             | 2-way<br>ANOVA         | Genotype (G)           | 0.742   |
|                                 |                 |                        | Diet (D)               | 0.015   |
|                                 |                 |                        | Interaction (G × D)    | 0.449   |
|                                 |                 | Tukey's<br>test        | 5xFAD (n) vs 5xFAD (F) | 0.444   |
|                                 |                 |                        | WT (F) vs 5xFAD (F)    | 0.953   |
|                                 |                 |                        | WT (n) vs 5xFAD (n)    | 0.938   |
|                                 | 24h             | 2-way<br>ANOVA         | Genotype (G)           | 0.937   |
|                                 |                 |                        | Diet (D)               | 0.020   |
| Interaction (G × D)             |                 |                        | 0.526                  |         |
| Tukey's<br>test                 |                 | 5xFAD (n) vs 5xFAD (F) | 0.456                  |         |
|                                 |                 | WT (F) vs 5xFAD (F)    | 0.993                  |         |
|                                 |                 | WT (n) vs 5xFAD (n)    | 0.914                  |         |
| 48h                             | 2-way<br>ANOVA  | Genotype (G)           | 0.770                  |         |
|                                 |                 | Diet (D)               | 4.E-04                 |         |
|                                 |                 | Interaction (G × D)    | 0.700                  |         |
|                                 | Tukey's<br>test | 5xFAD (n) vs 5xFAD (F) | 0.019                  |         |
|                                 |                 | WT (F) vs 5xFAD (F)    | 0.991                  |         |
|                                 |                 | WT (n) vs 5xFAD (n)    | 0.994                  |         |
|                                 |                 |                        | WT (n) vs WT (F)       | 0.043   |

|                                  |                 |                        |                        | P-value |
|----------------------------------|-----------------|------------------------|------------------------|---------|
| Sup Fig<br>3C:<br>Body<br>Weight | 0h              | 2-way<br>ANOVA         | Genotype (G)           | 0.980   |
|                                  |                 |                        | Diet (D)               | 0.739   |
|                                  |                 |                        | Interaction (G × D)    | 0.928   |
|                                  |                 | Tukey's<br>test        | 5xFAD (n) vs 5xFAD (F) | 0.990   |
|                                  |                 |                        | WT (F) vs 5xFAD (F)    | 0.999   |
|                                  |                 |                        | WT (n) vs 5xFAD (n)    | 1.000   |
|                                  | 6h              | 2-way<br>ANOVA         | Genotype (G)           | 0.522   |
|                                  |                 |                        | Diet (D)               | 0.116   |
|                                  |                 |                        | Interaction (G × D)    | 0.818   |
|                                  |                 | Tukey's<br>test        | 5xFAD (n) vs 5xFAD (F) | 0.748   |
|                                  |                 |                        | WT (F) vs 5xFAD (F)    | 0.979   |
|                                  |                 |                        | WT (n) vs 5xFAD (n)    | 1.000   |
|                                  | 12h             | 2-way<br>ANOVA         | Genotype (G)           | 0.504   |
|                                  |                 |                        | Diet (D)               | 0.033   |
|                                  |                 |                        | Interaction (G × D)    | 0.924   |
|                                  |                 | Tukey's<br>test        | 5xFAD (n) vs 5xFAD (F) | 0.413   |
|                                  |                 |                        | WT (F) vs 5xFAD (F)    | 0.996   |
|                                  |                 |                        | WT (n) vs 5xFAD (n)    | 1.000   |
|                                  | 24h             | 2-way<br>ANOVA         | Genotype (G)           | 0.483   |
|                                  |                 |                        | Diet (D)               | 0.034   |
| Interaction (G × D)              |                 |                        | 0.683                  |         |
| Tukey's<br>test                  |                 | 5xFAD (n) vs 5xFAD (F) | 0.541                  |         |
|                                  |                 | WT (F) vs 5xFAD (F)    | 0.966                  |         |
|                                  |                 | WT (n) vs 5xFAD (n)    | 0.999                  |         |
| 48h                              | 2-way<br>ANOVA  | Genotype (G)           | 0.890                  |         |
|                                  |                 | Diet (D)               | 0.009                  |         |
|                                  |                 | Interaction (G × D)    | 0.471                  |         |
|                                  | Tukey's<br>test | 5xFAD (n) vs 5xFAD (F) | 0.293                  |         |
|                                  |                 | WT (F) vs 5xFAD (F)    | 0.961                  |         |
|                                  |                 | WT (n) vs 5xFAD (n)    | 0.935                  |         |
|                                  |                 |                        | WT (n) vs WT (F)       | 0.080   |
